# Supplementary material for: Synthetic cobalt clays for the storage and slow release of therapeutic nitric oxide
Source: Royal Society of Chemistry journal article supplement (doi:10.1039/c6ra05794b), 2016-01-01
Supplement: c6ra05794b1.pdf [file c6ra05794b1.pdf]

## **Synthetic cobalt clays for the storage and slow release of therapeutic nitric oxide**

*Ana C. Fernandes<sup>a</sup>; Moisés L. Pinto<sup>b</sup>, Fernando Antunes<sup>a</sup>, João Pires<sup>a</sup>*

<sup>a</sup> Centro de Química e Bioquímica, Faculdade de Ciências, Universidade de Lisboa, 1749-016 Lisboa,  
Portugal

<sup>b</sup> CERENA, Instituto Superior Técnico, Universidade de Lisboa, Av. Rovisco Pais, nº 1, 1049-001 Lisboa,  
Portugal

### **Supplementary Information**

Figure S1: The structure of the 2:1 layered clays

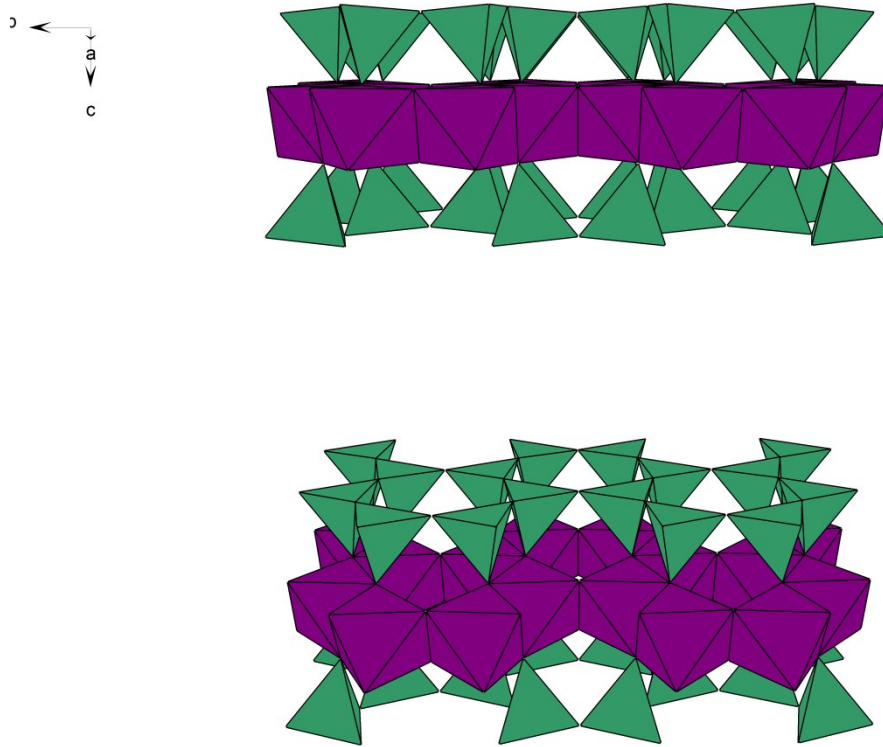

Fig. S1 Structure of a smectite (a 2:1 clay). Smectites are formed by one sheet of octahedral cations (usually  $\text{Al}^{3+}$ ,  $\text{Fe}^{2+}$ ,  $\text{Fe}^{3+}$  or  $\text{Mg}^{2+}$ ) in coordination with oxygen atoms – the corners of the octahedra (in dark violet), sandwiched between two opposing tetrahedral sheets of cations (usually  $\text{Si}^{4+}$  or  $\text{Al}^{3+}$ ) also coordinated with oxygen atoms – the corners of the tetrahedra (in green). Basal spacing ( $d_{001}$ ) includes the space (height) of the layers and of the interlayer region between two adjacent tetrahedral sheets.
